# Supplementary material for: Identification of 5-Methoxy-2-(Diformylmethylidene)-3,3-Dimethylindole as an Anti-Influenza A Virus Agent
Source: PubMed Central journal article supplement (PMC5256998; doi:10.1371/journal.pone.0170352), 2017-01-23

|      |   |    |    |    |         |
|------|---|----|----|----|---------|
| 526A | 0 | 0  | 75 | 75 | $\mu$ M |
| IAV  | - | 12 | -  | 12 | hr      |

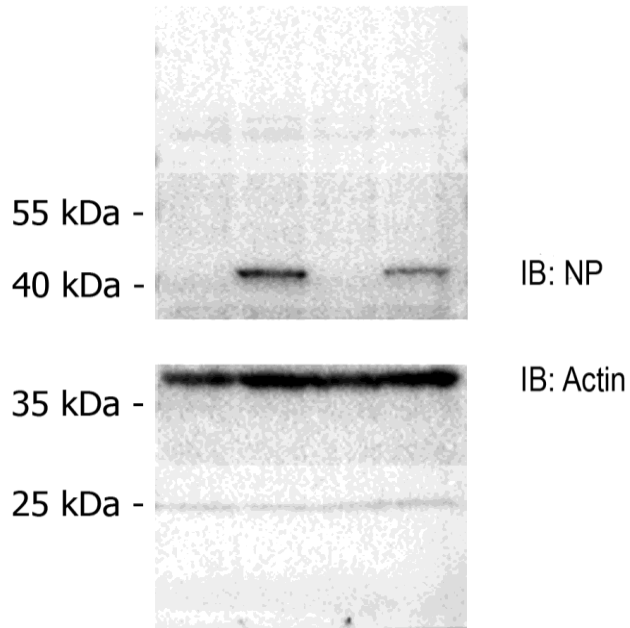

Supplement: pone.0170352.s007.pdf [file pone.0170352.s007.pdf]
