# Supplementary material for: Identification of 5-Methoxy-2-(Diformylmethylidene)-3,3-Dimethylindole as an Anti-Influenza A Virus Agent
Source: PubMed Central journal article supplement (PMC5256998; doi:10.1371/journal.pone.0170352), 2017-01-23

526A 0 0 25 50 75  $\mu$ M  
IAV - 12 12 12 12 hr

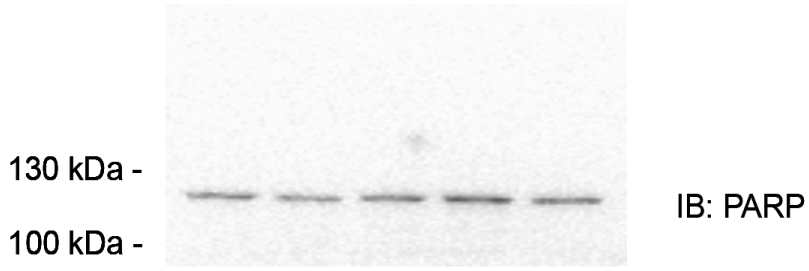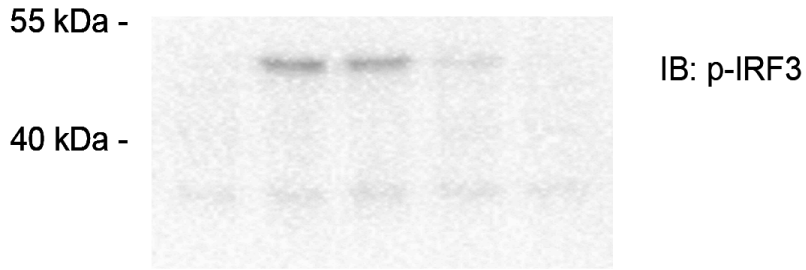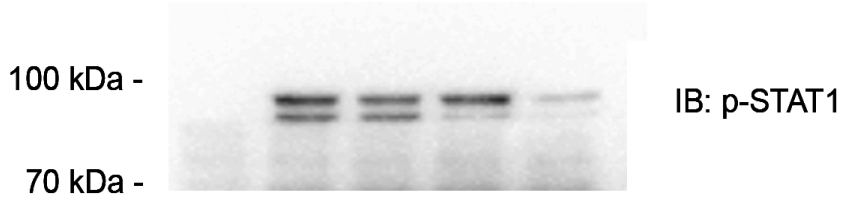

Supplement: pone.0170352.s010.pdf [file pone.0170352.s010.pdf]
